# Supplementary material
Source: Springer Nature journal article supplement (https://www.springermedizin.de/resource/supplementary/12969_2008_362_MOESM5_ESM.pdf/9592914)

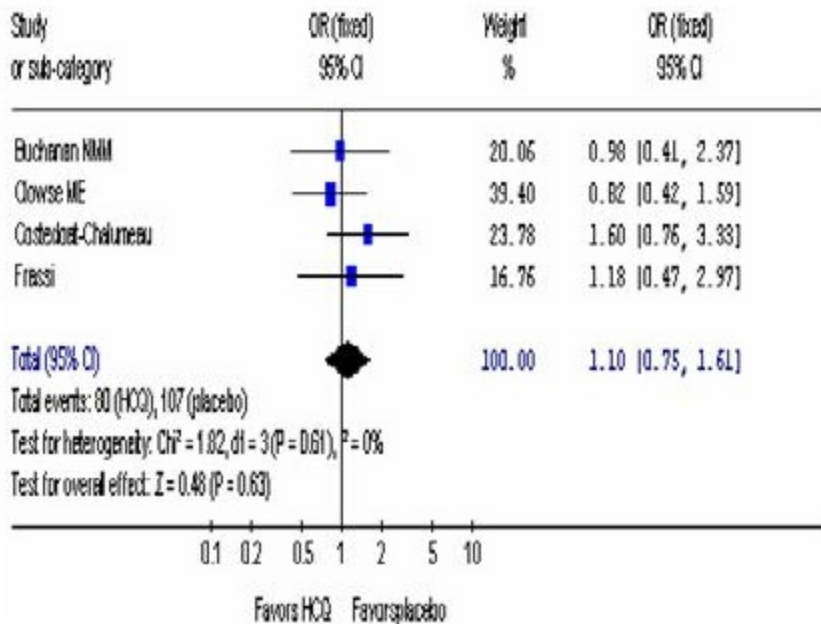

Supplement: MOESM5 [file 9592914]
